# Supplementary material
Source: PubMed Central journal article supplement (PMC3408174)
Supplement: supp_M112.341578_jbc.M112.341578-1.pdf [file supp_M112.341578_jbc.M112.341578-1.pdf]

Figure S1

| Inhibitor  | Target                                       |
|------------|----------------------------------------------|
| PP2        | Src-family tyrosine kinases                  |
| SU6656     | Src-family tyrosine kinases, Aurora kinases* |
| U0126      | MEK                                          |
| ZM447439   | Aurora B, Aurora A                           |
| RO-3306    | Cdk1                                         |
| nocodazole | Tubulin polymerization                       |

\* We showed the inhibitory effect of SU6656 on the activities of Aurora kinases in Fig. 1.

Fig. S1. List of inhibitors used in this study.
