# Supplementary material
Source: PubMed Central journal article supplement (PMC3408174)
Supplement: supp_M112.341578_jbc.M112.341578-2.pdf [file supp_M112.341578_jbc.M112.341578-2.pdf]

Figure S2

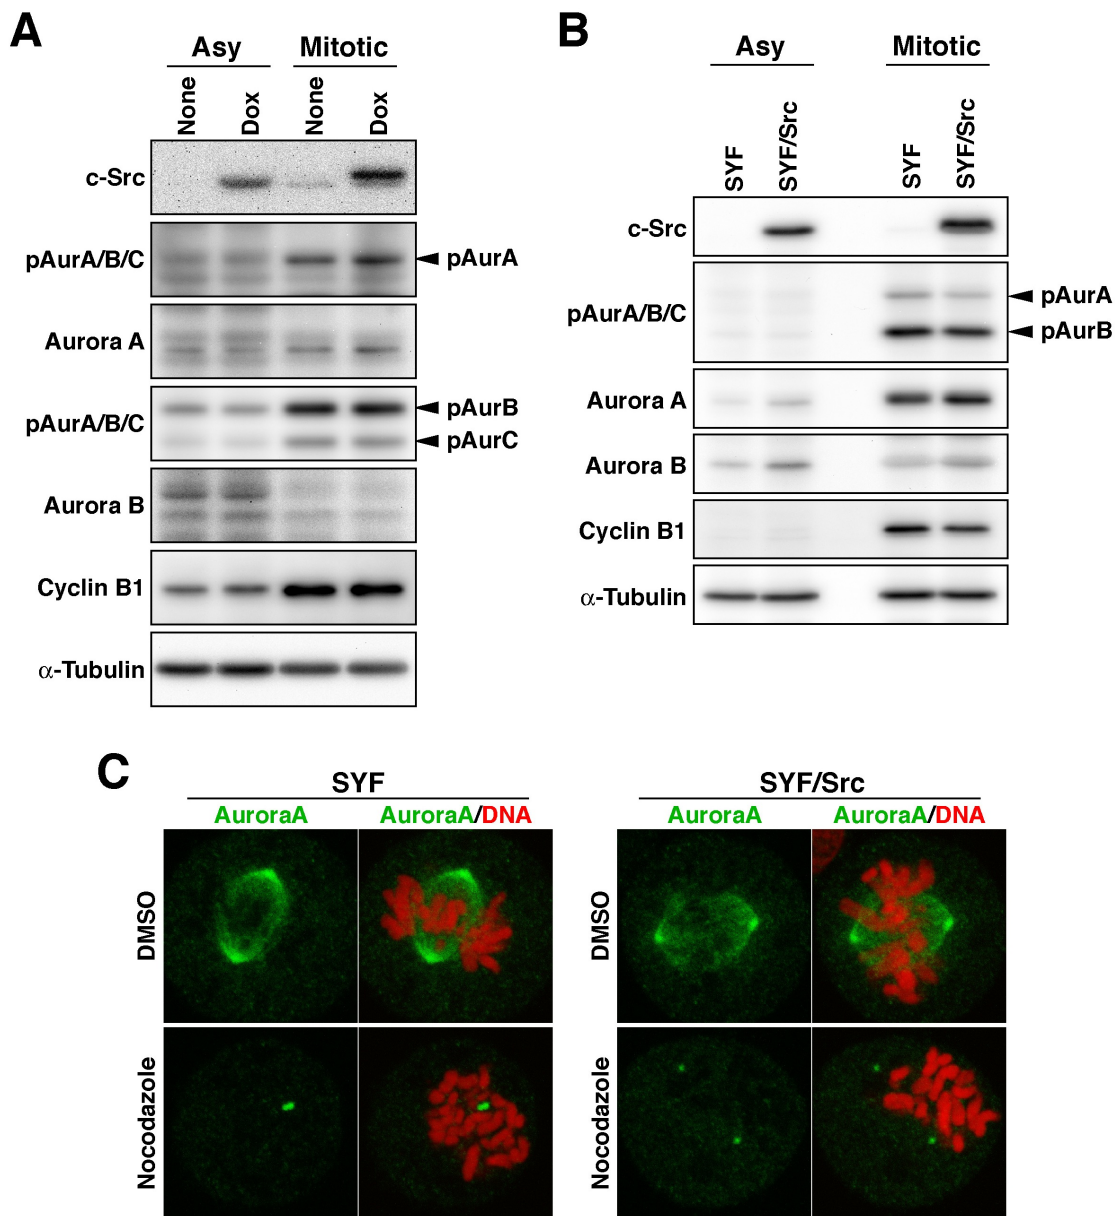**Fig. S2. c-Src does not affect Aurora A activity.**

(A) c-Src overexpression was induced in Src45 cells by exposure to 2  $\mu$ g/ml Dox for 2 days, as described previously (Kasahara et al., 2007b). Cells arrested at the G1/S border by treatment with 2 mM thymidine for 21 h were released into medium containing nocodazole for 12 h to trap cells at prometaphase. Mitotic cells were collected by mitotic shake-off and lysed with SDS-sample buffer. Whole cell lysates were subjected to Western blotting, probed with anti-phospho Aurora A/B/C (pAurA, pAurB, pAurC), anti-Aurora A, anti-Aurora B, anti-Src, anti-cyclin B1, and anti- $\alpha$ -tubulin (loading control) antibodies. (B) SYF and SYF/c-Src cells were arrested at late G2 phase by treatment with 8  $\mu$ M RO-3306 for 20 h and then released into fresh medium for 30 min. Mitotic cells were collected by mitotic shake-off and lysed with SDS-sample buffer. The lysates prepared from asynchronous and mitotic cells were subjected to Western blotting, probed with anti-phospho Aurora A/B/C (pAurA, pAurB, pAurC), anti-Aurora A, anti-Aurora B, anti-Src, anti-cyclin B1, and anti- $\alpha$ -tubulin (loading control) antibodies. (C) SYF and SYF/c-Src cells arrested at late G2 phase by 8  $\mu$ M RO-3306 were released into fresh medium with or without 100 ng/ml nocodazole for 25 min, fixed and stained for Aurora A and DNA.
